# Supplementary material for: Long-Distance and Frequent Movements of the Flying-Fox Pteropus poliocephalus: Implications for Management
Source: PubMed Central journal article supplement (PMC3411823; doi:10.1371/journal.pone.0042532), 2012-08-03
Supplement: pone.0042532.s002.pdf [file pone.0042532.s002.pdf]

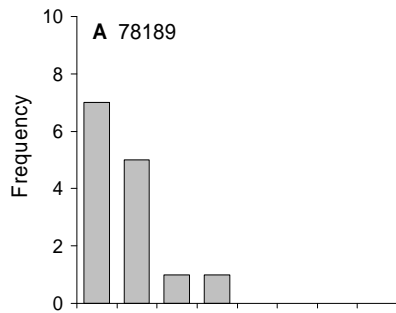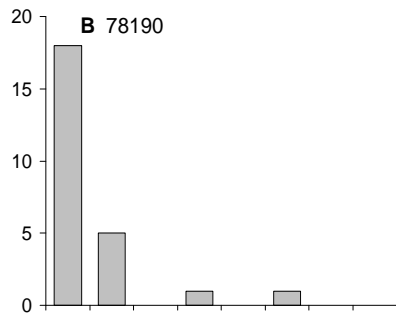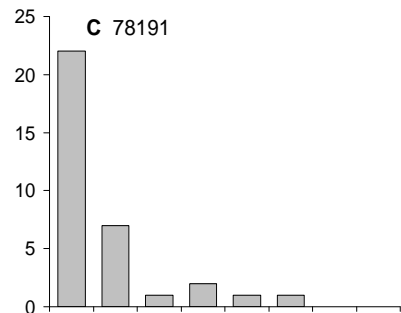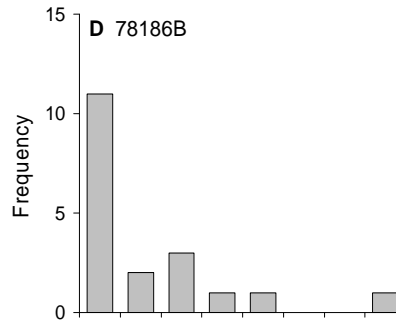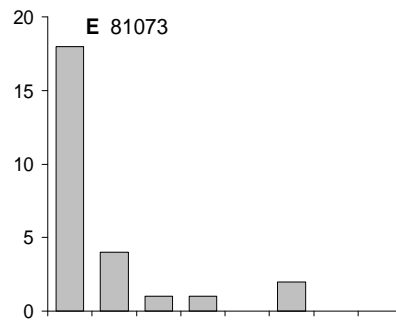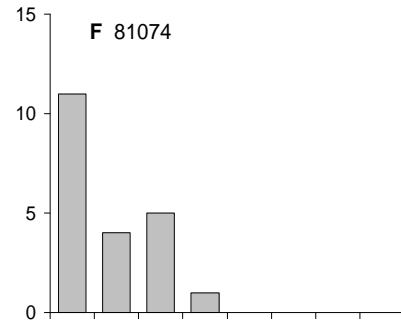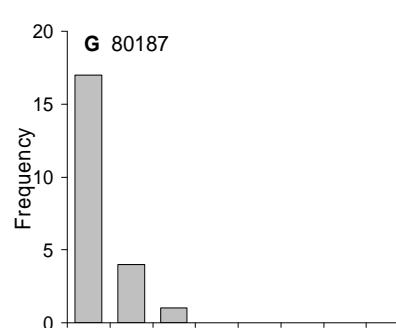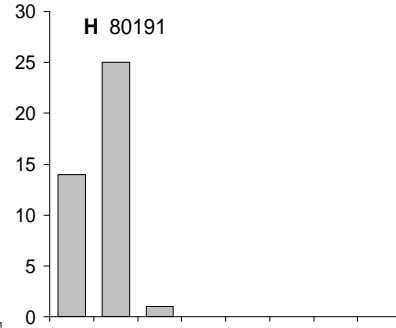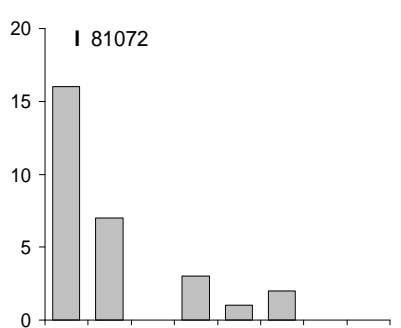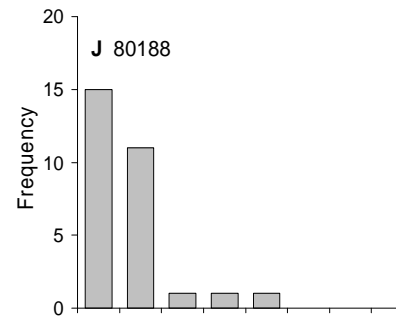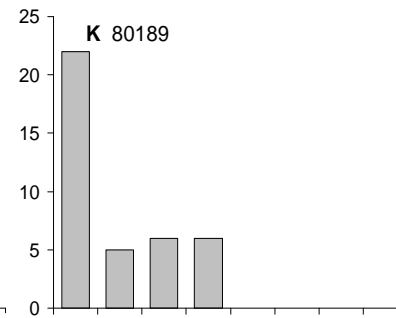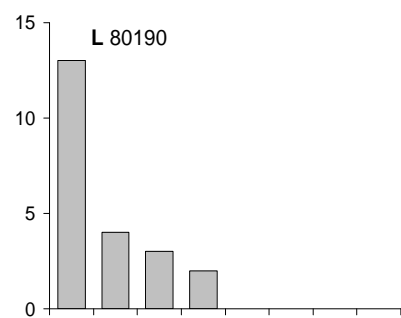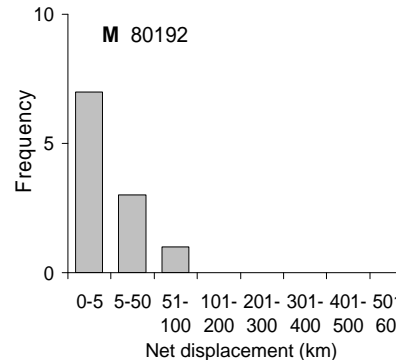

0-5 5-50 51- 101- 201- 301- 401- 501-  
100 200 300 400 500 600  
Net displacement (km)

0-5 5-50 51- 101- 201- 301- 401- 501-  
100 200 300 400 500 600  
Net displacement (km)
